# Supplementary material
Source: publisher figshare collection journal article supplement (https://tandf.figshare.com/ndownloader/files/20047709)
Supplement: Supplementary file 1 [file 20047709]

**Supporting Information**

**Table S1: Densities, *ρ* of pure components at *T*= 298.15 K and pressure *p* =**0.1 MPa

| Chemical Name | (g·cm–3) | |
| --- | --- | --- |
| expt. | lit. |
| Aniline | 1.0167 | 1.01744 a |
|
| 1-pentanol | 0.8108 | 0.81073b |
| 1-hexanol | 0.8151 | 0.8148 c |
| 1-heptanol | 0.8187 | 0.81879 d |
| 1-octanol | 0.8214 | 0.82181 e |
| 1-nonanol | 0.8240 | 0.82448 f |
| 1-decanol | 0.8261 | 0.8265 g |

a Ref 13. b Ref 14. c Ref 15. d Ref 16. e Ref 17. f Ref 18. g Ref 19.

Standard uncertainties are *u*(*T*) = 0.02 K, *u*(*x*) = 0.001, *u*(*p*) = 10 kPa, expanded uncertainty for density is *U*(*ρ*) = 0.001 g·cm-3

**Table S2. Experimental properties of pure compounds at *T =* 298.15 K needed for the application of the Kirkwood–Buff formalism. a**

| Compound | ( cm–3.mol-1) | 104(K-1) | (M.Pa-1) |
| --- | --- | --- | --- |
| Aniline | 91.6 | 863 | 731 |
| 1-Pentanol | 108.7 | 916 | 884 |
| 1-Hexanol | 125.3 | 883 | 836 |
| 1-Heptanol | 142.8 | 858 | 804 |
| 1-Octanol | 158.5 | 851 | 783 |
| 1-Nonanol | 175 | 846 | 752 |
| 1-Decanol | 191.5 | 823 | 731 |

a *Vi* , molar volume; isobaric thermal expansion coefficient; , isothermal compressibility.

**Table S3. Densities *ρ* for Binary mixtures Aniline (AN) with 1-alkanol at *T* = 298.15 K and pressure *p* = 0.1 MPa a**.

| AN(1) + 1-pentanol (2) | | AN (1) + 1-hexanol (2) | | AN (1) + 1-heptanol (2) | | AN (1) + 1-octanol (2) | |
| --- | --- | --- | --- | --- | --- | --- | --- |
| *x*1 |  | *x*1 |  | *x*1 |  | *x*1 |  |
| 0  0.0814  0.1597  0.2397  0.3497  0.4391  0.5598  0.6506  0.7406  0.8493  0.9403  1 | 0.8108  0.8256  0.8400  0.8552  0.8767  0.8947  0.9197  0.9387  0.9581  0.9821  1.0028  1.0167 | 0  0.0804  0.1599  0.2402  0.3508  0.4405  0.5598  0.6495  0.7393  0.8504  0.9396  1 | 0.8151  0.8274  0.8400  0.8534  0.8730  0.8897  0.9134  0.9322  0.9520  0.9782  1.0006  1.0167 | 0  0.0810  0.1603  0.2404  0.3511  0.4404  0.5593  0.6501  0.7400  0.8500  0.9407  1 | 0.8187  0.8294  0.8405  0.8524  0.8701  0.8856  0.9082  0.9269  0.9471  0.9743  0.9991  1.0167 | 0  0.0806  0.1597  0.2395  0.3506  0.4410  0.5609  0.6501  0.7410  0.8503  0.9406  1 | 0.8214  0.8306  0.8404  0.8510  0.8672  0.8817  0.9032  0.9214  0.9421  0.9704  0.9972  1.0167 |

a Standard uncertainties are *u*(*T*) = 0.02 K, *u*(*x*) = 0.001, *u*(*p*) = 10 kPa, expanded uncertainty for density is *U*(*ρ*) = 0.001 g·cm-3

| AN (1) + 1-nonanol (2) | | AN (1) + 1-decanol (2) | |
| --- | --- | --- | --- |
| *x*1 |  | *x*1 |  |
| 0  0.0803  0.1595  0.2396  0.3507  0.4404  0.5600  0.6493  0.7397  0.8496  0.9401  1 | 0.8240  0.8320  0.8407  0.8503  0.8651  0.8785  0.8991  0.9169  0.9375  0.9668  0.9953  1.0167 | 0  0.0796  0.1587  0.2381  0.3494  0.4401  0.5605  0.6495  0.7401  0.8504  0.9405  1 | 0.8261  0.8331  0.8408  0.8493  0.8629  0.8757  0.8954  0.9128  0.9335  0.9637  0.9936  1.0167 |

**Table S3. Continued**

**Table S4: Coefficients of preferential solvation, and excess molar volumes for binary mixtures**

| Aniline(1) + 1-Pentanol (2) | | | | |
| --- | --- | --- | --- | --- |
| *x*1 |  |  | -0.061  -0.094  -0.141  -0.197  -0.235  -0.254  -0.226  -0.184  -0.121  -0.051 | |
| 0.0814  0.1597  0.2397  0.3497  0.4391  0.5598  0.6506  0.7406  0.8493  0.9403 | 8.3  19.3  31.7  41.8  47  50.4  54.2  55  42.6  17.2 | -3.7  -11.4  -16.9  -22.6  -29  -36  -43.1  -48  -39.7  -16.6 |
| Aniline(1) + 1-Hexanol (2) | | | | |
| 0.0804  0.1599  0.2402  0.3508  0.4405  0.5598  0.6495  0.7393  0.8504  0.9396 | 4.5  12  22.5  33.7  38.8  42.2  45.3  47.1  37  14.8 | -5.4  -13.3  -16.2  -23.6  -29.5  -35.7  -40.9  -44.7  -37.2  -15.3 | -0.026  -0.043  -0.068  -0.103  -0.124  -0.142  -0.128  -0.097  -0.062  -0.021 | |
| Aniline(1) + 1-Heptanol (2) | | | |  |
| *x*1 |  |  | -0.004  -0.009  -0.013  -0.021  -0.031  -0.038  -0.031  -0.021  -0.009  -0.004 |  |
| 0.0810  0.1603  0.2404  0.3511  0.4404  0.5593  0.6501  0.7400  0.8500  0.9407 | 1.1  5.8  14.4  25.3  30.4  32.6  35.7  37.5  31.4  11.9 | -7.7  -16.7  -17.2  -25.4  -30.8  -34.7  -39.3  -41.5  -35.5  -14 |  |
| Aniline(1) + 1-Octanol (2) | | | |  |
| 0.0806  0.1597  0.2395  0.3506  0.4410  0.5609  0.6501  0.7410  0.8503  0.9406 | -6.3  -11.9  -17  -22.4  -28.1  -38.2  -50.7  -57.7  -44.6  -15.5 | -12.9  -23.1  -25.1  -21.4  -18  -12.3  1.1  16.1  19.3  7.4 | 0.031  0.056  0.081  0.103  0.124  0.147  0.137  0.115  0.073  0.026 |  |

| Aniline(1) + 1-Nonanol (2) | | | |
| --- | --- | --- | --- |
| *x*1 |  |  |  |
| 0.0803  0.1595  0.2396  0.3507  0.4404  0.56  0.6493  0.7397  0.8496  0.9401 | -8.1  -15.9  -23  -31.1  -39.1  -53.3  -67.4  -77.8  -61.7  -23.9 | -16.9  -28.6  -29.9  -23.7  -16.5  -7.5  6.8  24.2  28.1  12.4 | 0.077  0.132  0.184  0.226  0.261  0.276  0.251  0.211  0.128  0.051 |
| Aniline(1) + 1-Decanol (2) | | | |
| 0.0796  0.1587  0.2381  0.3494  0.4401  0.5605  0.6495  0.7401  0.8504  0.9405 | -10.1  -19.3  -28.6  -40.3  -50  -72.1  -91.9  -101.3  -77.7  -30.2 | -22.8  -39  -38.3  -27  -18.5  -5.6  12.8  31.4  33.2  15.4 | 0.128  0.221  0.312  0.385  0.421  0.436  0.389  0.316  0.197  0.085 |
